# Supplementary material for: Mesocrystalline effect in a NiTiO3/TiO2 nanocomposite for enhanced capacity of lithium-ion battery anodes
Source: Royal Society of Chemistry journal article supplement (doi:10.1039/d1qi01501j), 2022-01-01
Supplement: d1qi01501j1.pdf [file d1qi01501j1.pdf]

## Supporting information

### **Mesocrystalline Effect in NiTiO<sub>3</sub>/TiO<sub>2</sub> Nanocomposite for Enhanced Capacity of Lithium-ion Battery Anode**

Xing Wang<sup>a</sup>, Weijie Cheng<sup>b</sup>, Jiaqiao Hu<sup>b</sup>, Ying Su<sup>b</sup>, Xingang Kong<sup>b</sup>, Shinobi Uemura<sup>a</sup>, Takafumi Kusunose<sup>a</sup>, Qi Feng<sup>a\*</sup>

<sup>a</sup> Department of Advanced Materials Science, Faculty of Engineering and Design, Kagawa University, 2217-20 Hayashi-cho, Takamatsu-shi, 761-0396, Japan

<sup>b</sup> School of Materials Science and Engineering, Shaanxi University of Science and Technology, Weiyang, Xi'an, Shaanxi, 710021, PR China

\* Corresponding author. Department of Advanced Materials Science, Faculty of Engineering and Design, Kagawa University, 2217-20 Hayashi-cho, Takamatsu-shi, 761-0396, Japan

E-mail address: [feng.qi@kagawa-u.ac.jp](mailto:feng.qi@kagawa-u.ac.jp)

#### **Synthesis of L-NiTiO<sub>3</sub>/TiO<sub>2</sub> nanocomposites from Ni-HTO ion exchanged products**

The Ni<sup>2+</sup>-exchanged HTO (Ni-HTO) sample was obtained by treating 0.5 g of HTO in a 0.5 mol/L Ni (CH<sub>3</sub>COO)<sub>2</sub> solution (100 mL) under stirring conditions for 12 h. The Ni-HTO sample was heated in air atmosphere at 600 °C for 3 h to obtain a

NiTiO<sub>3</sub>/TiO<sub>2</sub> nanocomposite sample (L-NiTiO<sub>3</sub>/TiO<sub>2</sub>) with low NiTiO<sub>3</sub> content.

**Table S1** Molar ratios of Ni/Ti in Ni-HTO, Ni-H<sub>2</sub>O<sub>2</sub>-HTO, Ni-HTO-ns and Ni-H<sub>2</sub>O<sub>2</sub>-HTO-ns.

| Samples                                  | Ni/Ti (At%) |
|------------------------------------------|-------------|
| Ni-HTO                                   | 0.046       |
| Ni-H <sub>2</sub> O <sub>2</sub> -HTO    | 0.347       |
| Ni-HTO-ns                                | 0.480       |
| Ni-H <sub>2</sub> O <sub>2</sub> -HTO-ns | 0.734       |

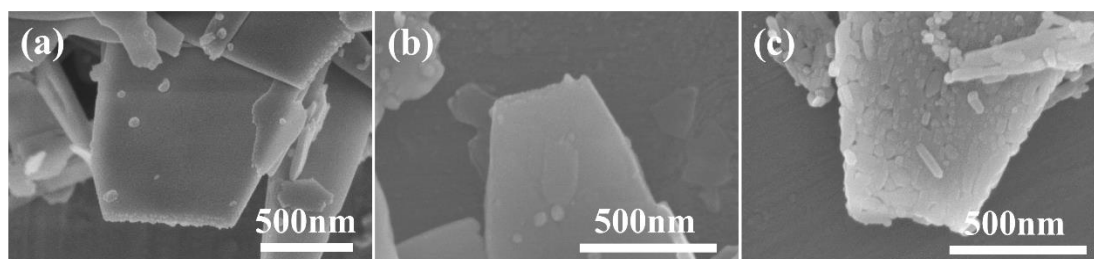

**Fig. S1** FE-SEM images of (a) H<sub>2</sub>O<sub>2</sub>-HTO, (b) Ni-HTO and (c) products after heated Ni-HTO at 600 °C.

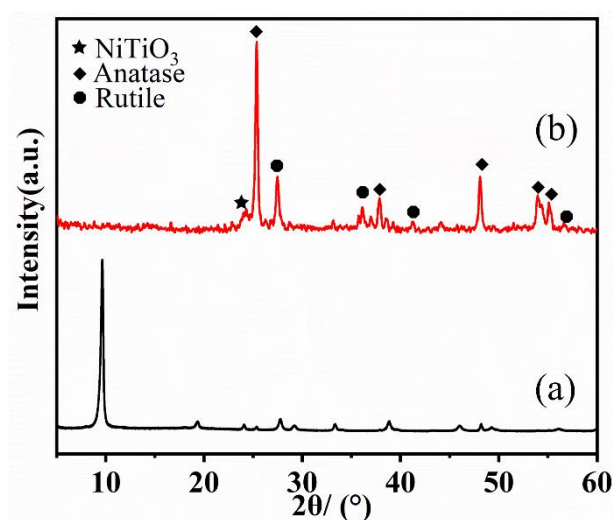

**Fig. S2** XRD patterns of (a) Ni-HTO and (b) product after heat-treatment of Ni-HTO at 600 °C.

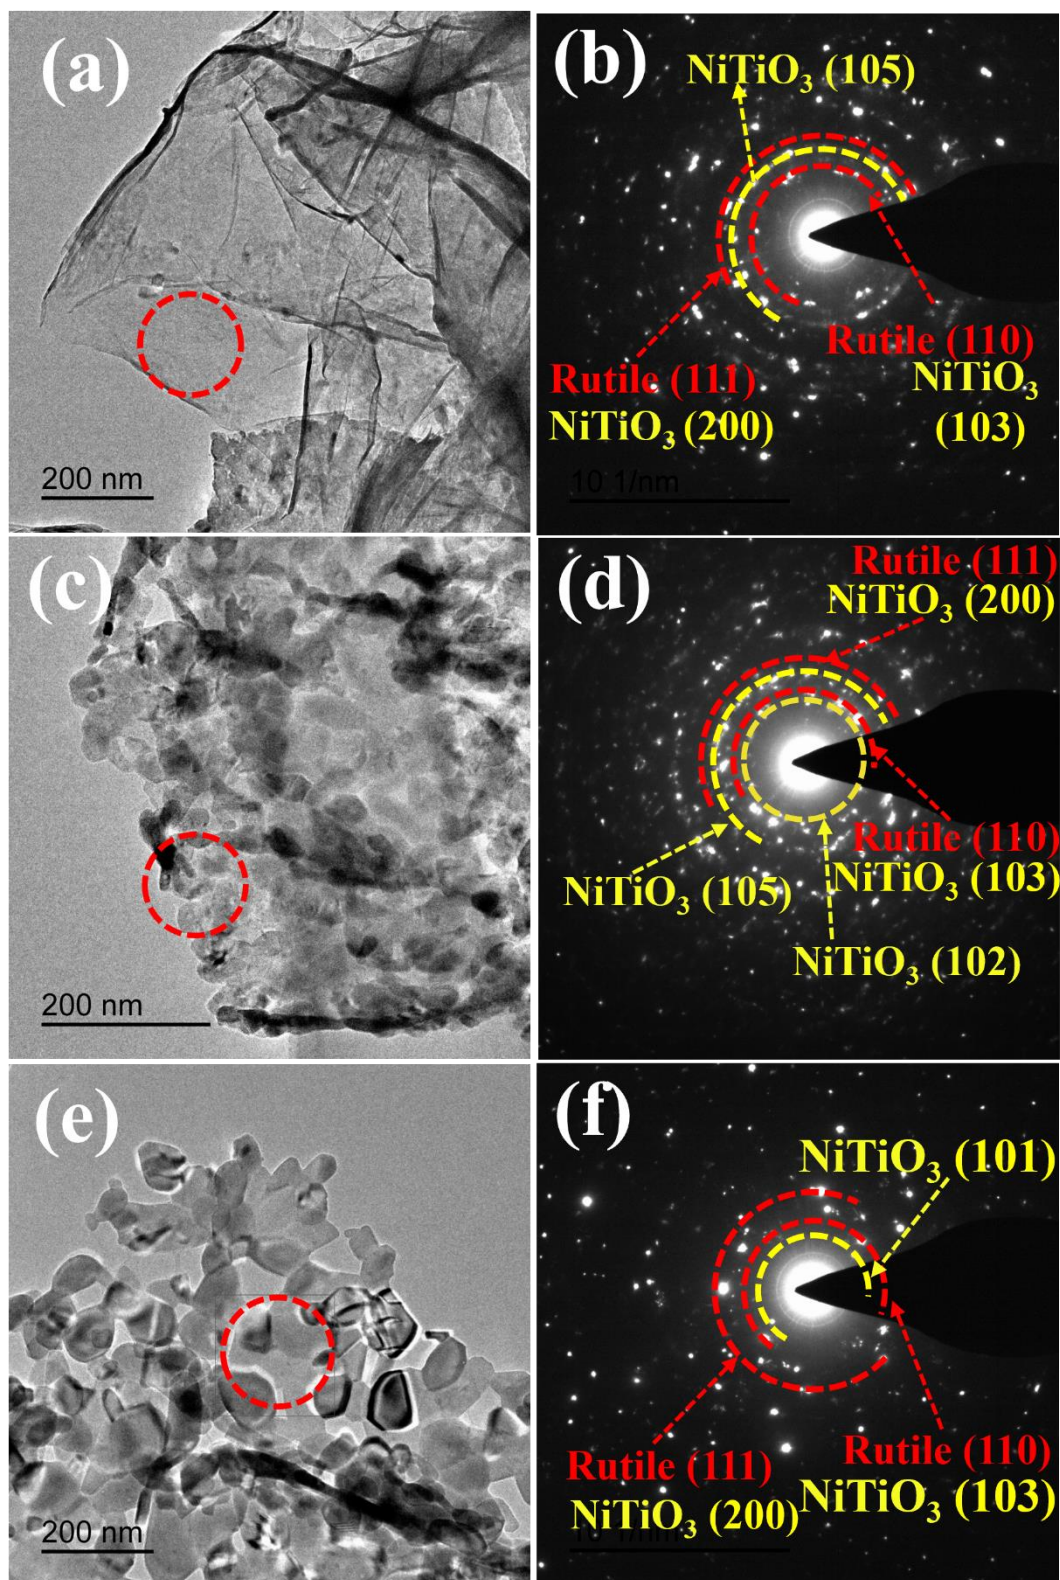

**Fig.S3** TEM images and SAED patterns of (a, b) Ni-H<sub>2</sub>O<sub>2</sub>-HTO-ns-500, (c, d) Ni-H<sub>2</sub>O<sub>2</sub>-HTO-ns-600, (e, f) Ni-H<sub>2</sub>O<sub>2</sub>-HTO-ns-700

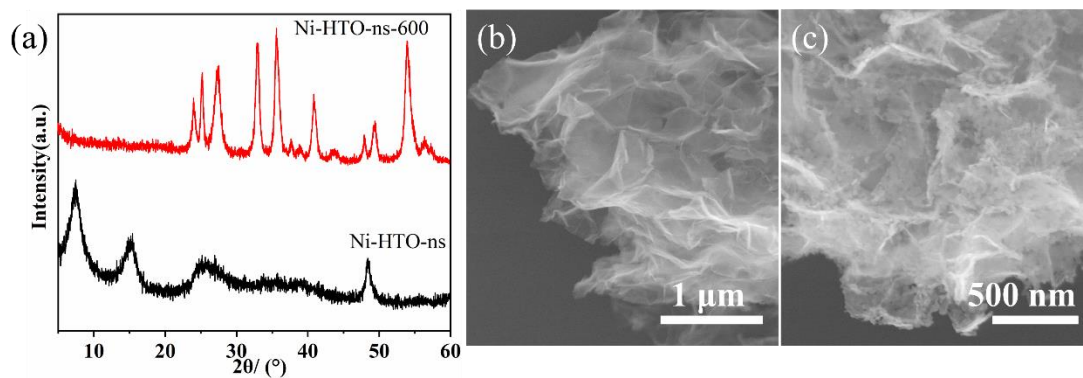

**Fig. S4** XRD patterns of (a) Ni-HTO-ns and its heat-treated product at  $600^{\circ}\text{C}$ , FE-SEM images of (b) Ni-HTO-ns and (c) its heat-treated product at  $600^{\circ}\text{C}$ .

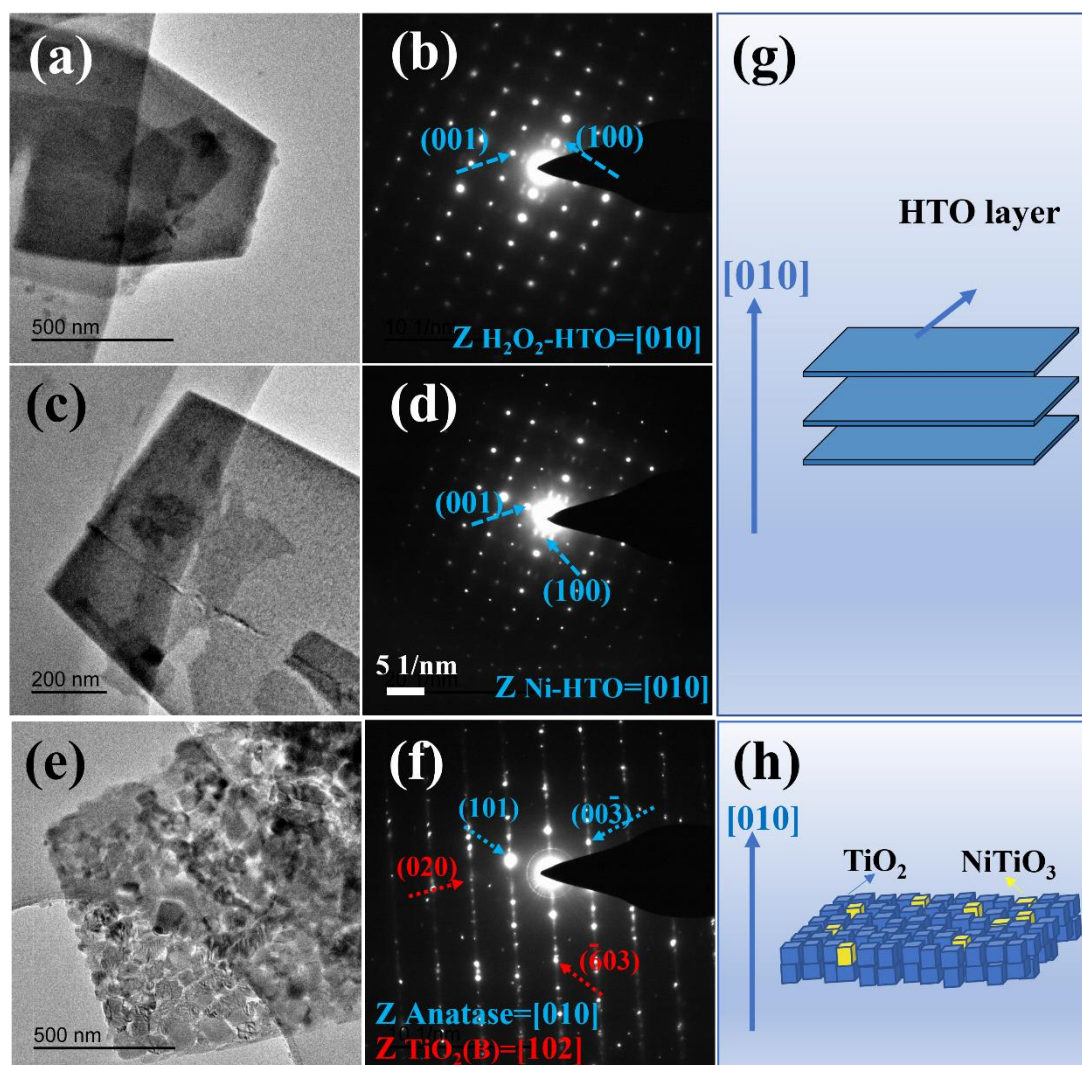

**Fig. S5** TEM images and SAED patterns of (a, b)  $\text{H}_2\text{O}_2\text{-HTO}$ , (c, d) Ni-HTO, (e, f) Ni-HTO-600, and (g, h) corresponding layered structures.

Ni-HTO has a platelike particle morphology and shows a SAED pattern similar to

HTO and H<sub>2</sub>O<sub>2</sub>-HTO. In the SAED pattern (Fig. S5(b)), one set of single crystalline diffraction spots with  $d$ -values of 3.73 nm and 2.96 nm were observed, which correspond to (100) and (001) planes of HTO, respectively, suggesting that [010]-crystal-axis of H<sub>2</sub>O<sub>2</sub>-HTO phase is vertical to the basal plane of the platelike particle, as shown in Fig. S4 (g).

The TEM result indicated that the Ni-HTO-600 also possesses the platelike particle morphology constructed from nanocrystals with size of about 50 nm (Fig. S5(e)). The SAED patterns display two sets of single-crystal-like diffraction spots. One set with  $d$ -values of 0.352 and 0.317 nm can be attributed to (101) and (00 $\bar{3}$ ) planes of anatase, respectively (Fig. S5(f)). And another set corresponds to (020) and ( $\bar{6}$ 03) planes of TiO<sub>2</sub>(B), consistent with the previous study.<sup>1</sup> The SAED result suggests all the anatase nanocrystals have the same orientation to [010]-crystal-axis and all TiO<sub>2</sub>(B) nanocrystals have the same orientation to [102]-crystal-axis, namely it is a mesocrystalline nanocomposite. The diffraction spots of NiTiO<sub>3</sub> were not observed due to its low content in the nanocomposite.

#### Reference

1. D. Hu, W. Zhang, Y. Tanaka, N. Kusunose, Y. Peng and Q. Feng, *Cryst. Growth Des.*, 2015, **15**, 1214-1225.

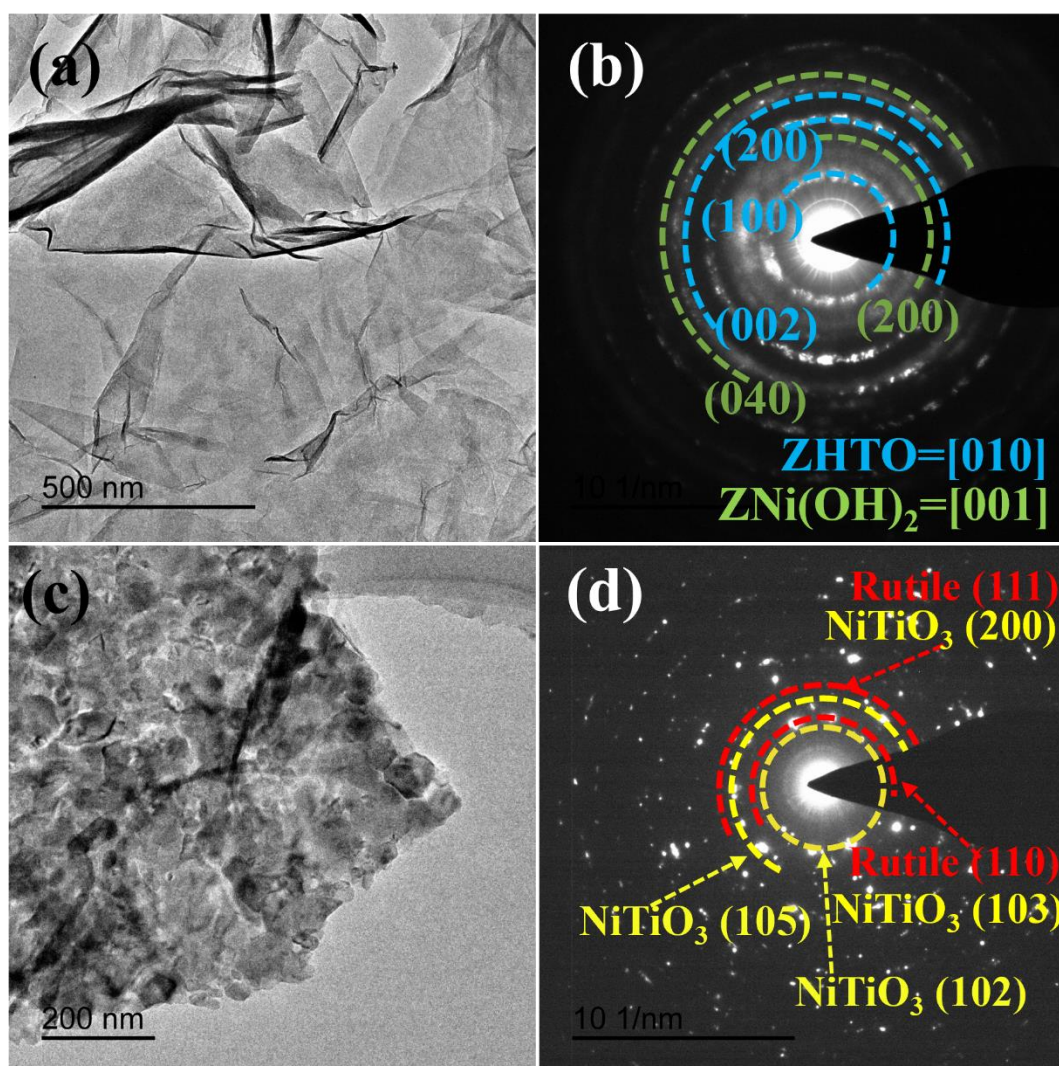

**Fig. S6** TEM images and SAED patterns of (a, b) Ni-HTO-ns, (c, d) Ni-HTO-ns-600.

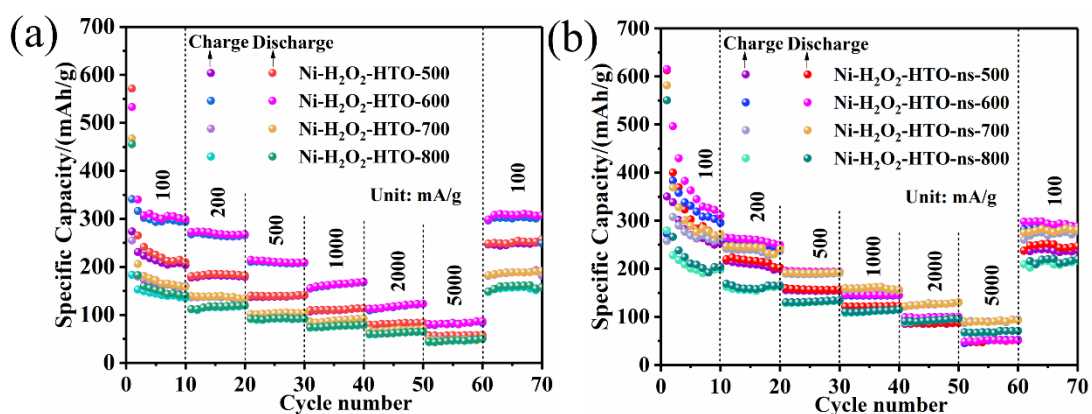

**Fig. S7** Rate capabilities of (a) mesocrystalline  $\text{NiTiO}_3/\text{TiO}_2$  nanocomposites and (b) polycrystalline  $\text{NiTiO}_3/\text{TiO}_2$  nanocomposites obtained by heat-treatment of  $\text{Ni-H}_2\text{O}_2\text{-HTO}$  and  $\text{Ni-H}_2\text{O}_2\text{-HTO-ns}$  at 500, 600, 700 and 800  $^\circ\text{C}$ , respectively.

**Table S2** Calculated parameters from Nyquist plots and equivalent circuit for Ni-HTO-ns-600 and Ni-H<sub>2</sub>O<sub>2</sub>-HTO-600 electrodes after 100<sup>th</sup> cycle at a current density of 100 mA/g in the frequency range of 100kHz to 0.01 Hz.

| Samples                                   | Re ( $\Omega$ ) | Rs ( $\Omega$ ) | Rct ( $\Omega$ ) | $\sigma$ ( $\Omega$ cm <sup>2</sup> s <sup>-0.5</sup> ) | D <sub>Li+</sub> (cm <sup>2</sup> S <sup>-1</sup> ) |
|-------------------------------------------|-----------------|-----------------|------------------|---------------------------------------------------------|-----------------------------------------------------|
| Ni-HTO-ns-600                             | 6.9             | 75.8            | 473.7            | 1418                                                    | 1.05x10 <sup>-17</sup>                              |
| Ni-H <sub>2</sub> O <sub>2</sub> -HTO-600 | 5.9             | 58.2            | 305.3            | 956                                                     | 2.31x10 <sup>-17</sup>                              |

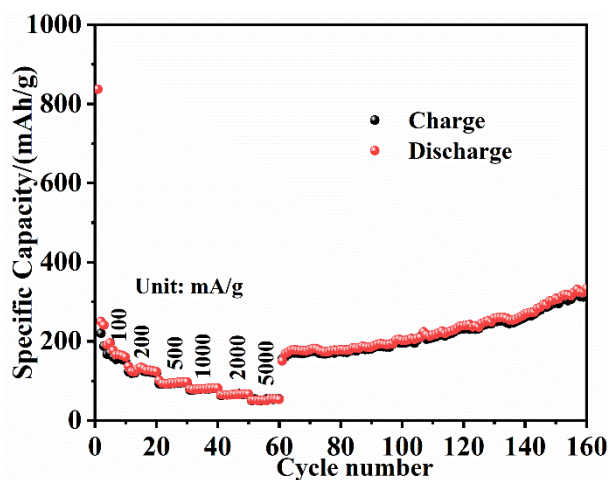

**Fig. S8** Rate capabilities and cycle performance at 100 mA/g for pure NiTiO<sub>3</sub> obtained by solid-state reaction.

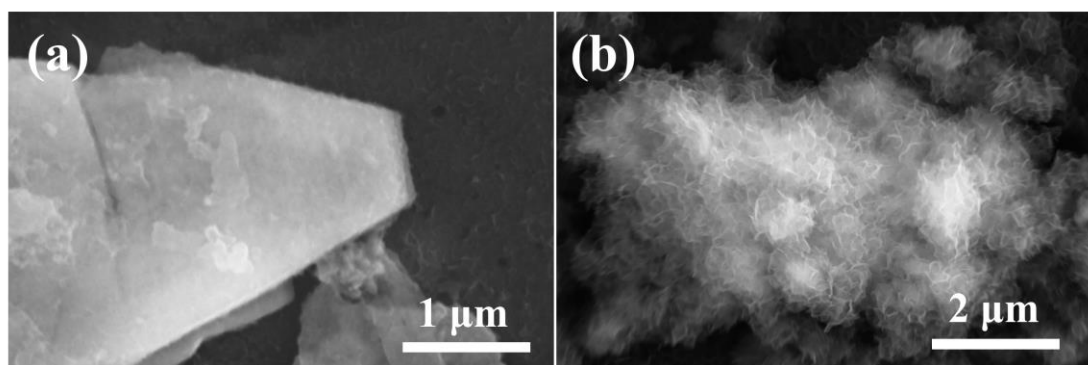

**Fig. S9** *Ex-situ* SEM images of (a) Ni-H<sub>2</sub>O<sub>2</sub>-HTO-600 (b) Ni-H<sub>2</sub>O<sub>2</sub>-HTO-ns-600 after 100 cycles at 100 mA/g.

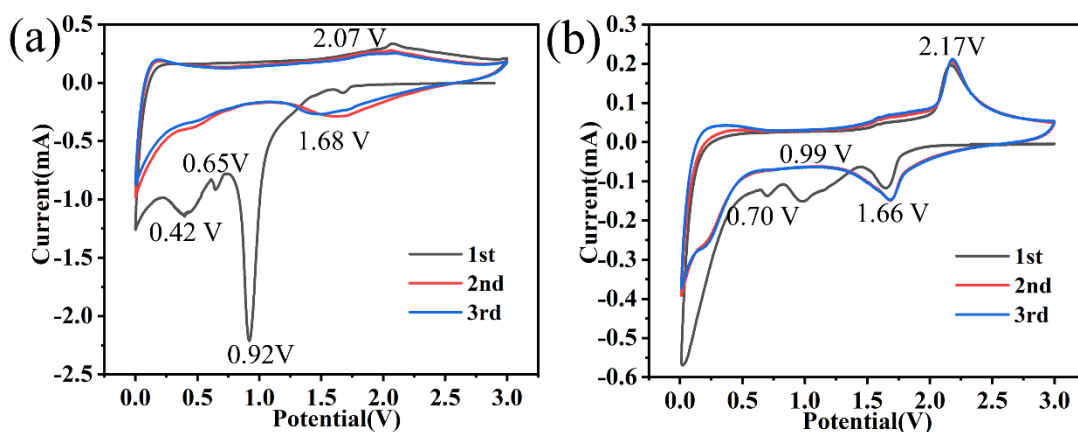

**Fig. S10** Cyclic voltammetry (CV) curves of (a) Ni-H<sub>2</sub>O<sub>2</sub>-HTO-ns-600 and (b) Ni-H<sub>2</sub>O<sub>2</sub>-HTO-600 at scan rate of 0.1 mV/s.

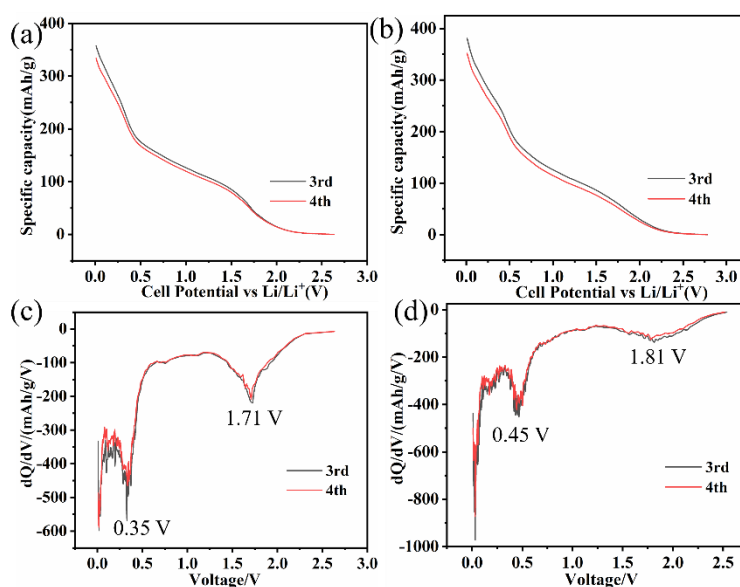

**Fig. S11** Discharge profiles at a current density of 100 mA/g for (a) Ni-H<sub>2</sub>O<sub>2</sub>-HTO-600 and (b) Ni-H<sub>2</sub>O<sub>2</sub>-HTO-ns-600; dQ/dV discharge curves for (c) Ni-H<sub>2</sub>O<sub>2</sub>-HTO-600 and (d) Ni-H<sub>2</sub>O<sub>2</sub>-HTO-ns-600 obtained from their discharge profiles.
